# Supplementary material for: CKII Control of Axonal Plasticity Is Mediated by Mitochondrial Ca2+ via Mitochondrial NCLX
Source: MDPI journal article supplement (doi:10.3390/cells11243990), 2022-12-09
Supplement: s1 [file s1]

## Supplemental Information

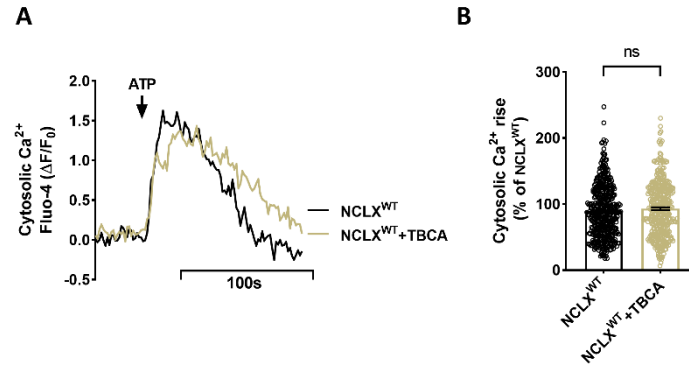

**Figure S1. TBCA effect on Cytosolic  $\text{Ca}^{2+}$**

**(A)** Representative fluorescent traces of SH-SY5Y Cells co-expressing shNCLX and NCLX<sup>WT</sup> (black), treated with TBCA (10 $\mu\text{M}$ ) for 2 hours (gold) and preloaded with Fluo-4 (2 $\mu\text{M}$ ). Cytosolic  $\text{Ca}^{2+}$  transient was triggered by application of extracellular ATP (100 $\mu\text{M}$ ) via  $\text{Ca}^{2+}$ -free Ringer's solution.

**(D)** Quantification of cytosolic  $\text{Ca}^{2+}$  influx amplitude in (A) (unpaired two-tailed t-test,  $t=1.358$ ,  $\text{df}=864$ : ns;  $n = \text{NCLX}^{\text{WT}}$  (452), NCLX<sup>WT</sup>+TBCA (414)).

ns- Not significant. Error bars denote SEM.

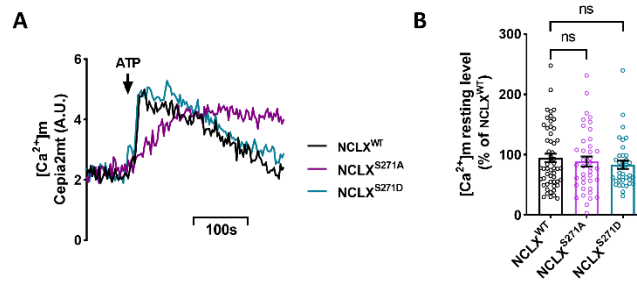

**Figure S2**

**(A)** Representative fluorescent (non-normalized) traces of ATP (100 $\mu\text{M}$ ) induced  $[\text{Ca}^{2+}]_{\text{m}}$  transients in Cepia2mt expressing SH-SY5Y cells co-expressing shNCLX and NCLX<sup>WT</sup> (black) or mutant NCLX<sup>S271A</sup> (purple) \ NCLX<sup>S271D</sup> (turquoise). A.U.- arbitrary units

**(B)** Quantification of  $[\text{Ca}^{2+}]_{\text{m}}$  basal intensity in (A) (Welch and Brown-Forsythe ANOVA,  $F(2,101.4)=0.8545$ ; Dunnett's T3 multiple comparisons test; NCLX<sup>WT</sup> vs. NCLX<sup>S271A</sup>: ns; NCLX<sup>WT</sup> vs. NCLX<sup>S271D</sup>: ns;  $n = \text{NCLX}^{\text{WT}}$  (54), NCLX<sup>S271A</sup> (40), NCLX<sup>S271D</sup> (37)).

ns- Not significant. Error bars denote SEM.
